# Supplementary material
Source: Springer Nature journal article supplement (https://www.springermedizin.de/resource/supplementary/12936_2007_435_MOESM2_ESM.pdf/9547444)

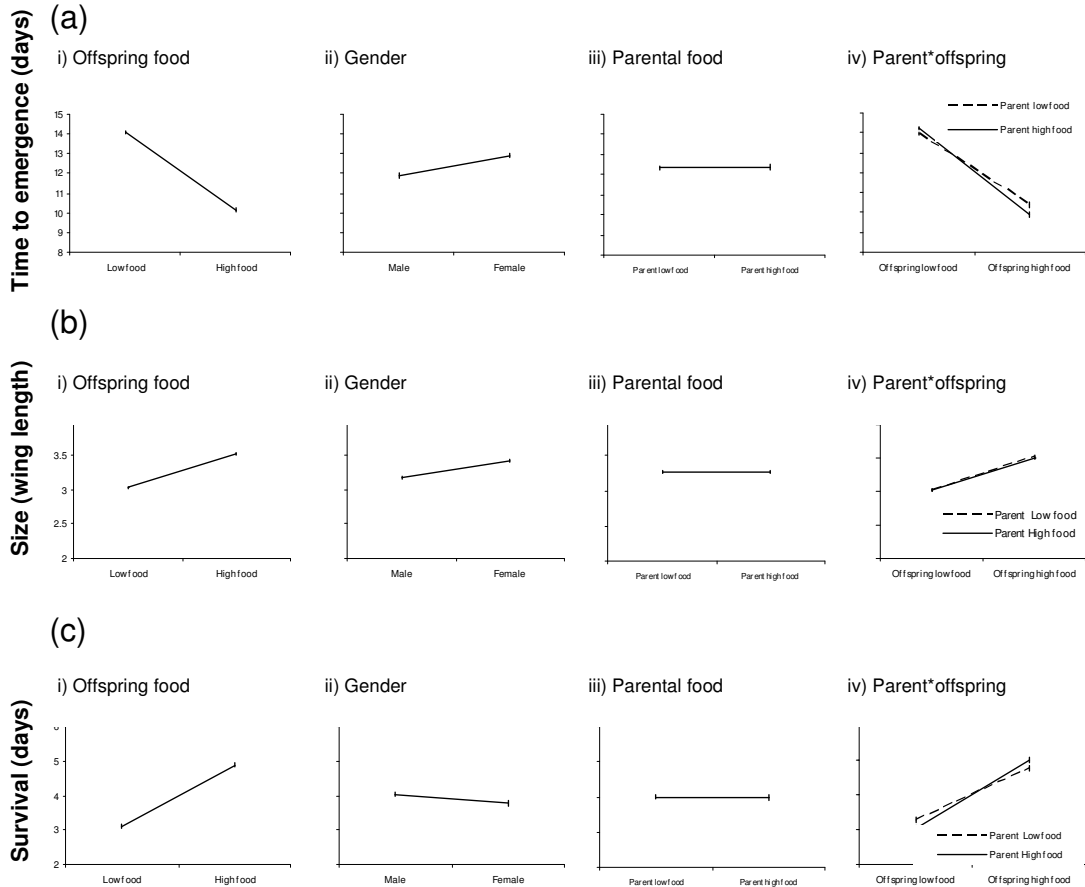

Figure 2

Supplement: MOESM2 [file 9547444]
